# Supplementary material for: Auditory Steady-State Response and Hearing Impairment in Survivors of Childhood Bacterial Meningitis in Luanda, Angola
Source: MDPI journal article supplement (doi:10.3390/jcm12082842), 2023-04-13
Supplement: s1 [file s1]

**Table S1.** Children with severe-to-profound hearing impairment, survivors of bacterial meningitis, in Luanda, Angola.

| Patient | Mean ASSR thresholds<br>R/L ear (dB nHL) | Age (months) | Language / verbal communication | Other                                 |
|---------|------------------------------------------|--------------|---------------------------------|---------------------------------------|
| 1       | >80 / >80                                | 29           | No                              |                                       |
| 2       | >80 / >80                                | 16           | No                              |                                       |
| 3       | >80 / 79.5                               | 14           | No                              | Severe multiple disabilities          |
| 4       | >80 / >80                                | 141          | Yes (writing)                   | Attending school for hearing disabled |
| 5       | >80 / >80                                | 52           | No                              |                                       |
| 6       | >80 / >80                                | 89           | No                              | Severe multiple disabilities          |
